# Supplementary material
Source: MDPI journal article supplement (https://www.mdpi.com/2072-4292/13/11/2134)
Supplement: s1 [file s1]

## Supplementary material

# Assessment of Morphology Changes of the End Moraine of the Werenskiöld Glacier (SW Spitsbergen) Using Active and Passive Remote Sensing Techniques

Tadeusz Głowacki<sup>1,\*</sup>, Damian Kasza<sup>1</sup>

<sup>1</sup>Wrocław University of Science and Technology, Faculty of Geoengineering, Mining and Geology, 27 Wyb. Wyspińskiego St., 50-370 Wrocław, Poland, \*tadeusz.glowacki@pwr.edu.pl

## Supplementary tables & figures:

- **Table S1:** Photogrammetry parameters.
- **Table S2:** InSAR processing methods and parameters.
- **Figure S1:** Baseline plot of interferograms generated and selected for dataset.
- **Figure S2:** Location of the pictures and measurements.
- **Figure S3:** Location of photogrammetry control points.

**Table S1.** Photogrammetry parameters.

| Dataset/year | Camera type                      | Picture format | Axis tilt [°] | Film type           | Flight altitude [m] |
|--------------|----------------------------------|----------------|---------------|---------------------|---------------------|
| 1936         | Zeiss 18/18f<br>c = 210 mm       | 18 x 18 cm     | -30           | Agfa Aeropan MF 11  | 2700                |
| 1960         | Wild RC-8<br>c = 153 mm          | 23 x 23 cm     | ≥1            | Kodak Aerochrome IR | 8000                |
| 1990         | Wild RC-20<br>c = 152 mm         | 23 x 23 cm     | ≥1            | Kodak Aerochrome IR | 8200                |
| 2011         | Vexcel UltraCam Xp<br>c = 100 mm | 23 x 15 cm     | ≥1            | CCD RGBIr           | 7400                |

**Table S2.** InSAR processing methods and parameters.

| SAR mode/geometry/polarization                   | InSAR processing method | Multi-looking factor/ground resolution | Maximum spatial and temporal base-lines | Number of selected/unselected interferograms | Observation period (first-last selected scenes) | Number of selected scenes | Coherence filter            |
|--------------------------------------------------|-------------------------|----------------------------------------|-----------------------------------------|----------------------------------------------|-------------------------------------------------|---------------------------|-----------------------------|
| Interferometric Wide Swath (IWS)<br>Ascending HH | Small Base-line Subset  | 8x2<br>40 x 40 m                       | 150 m<br>24 d                           | 14<br>11                                     | 2.08.2015 -<br>05.01.2016                       | 14                        | 0.45 in >50% interferograms |

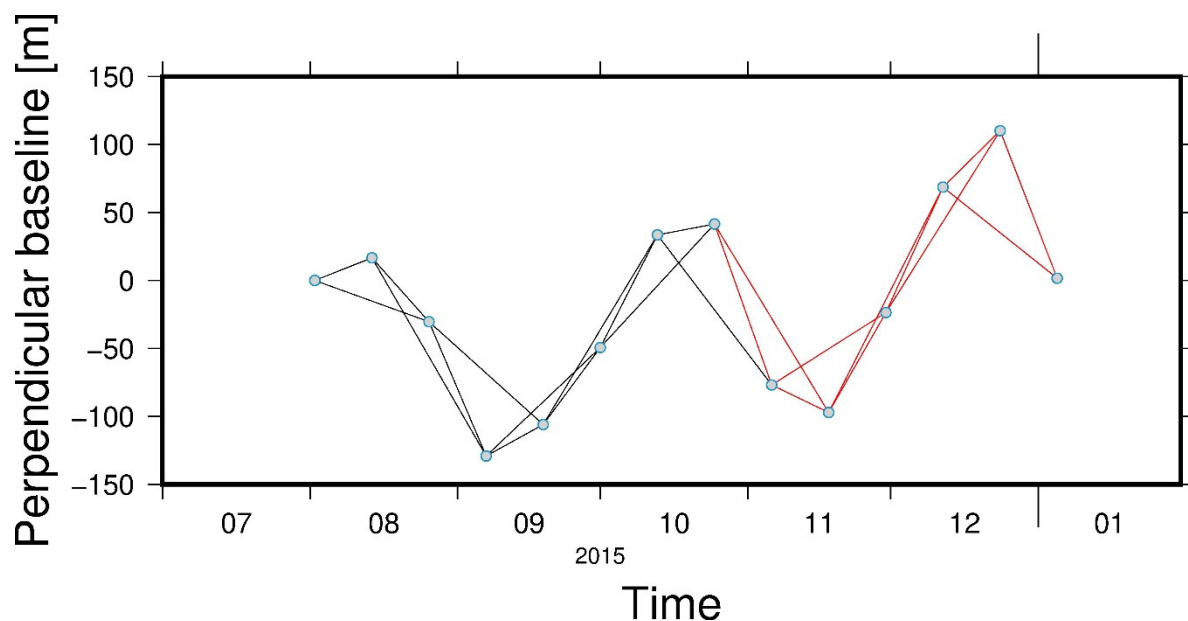

**Figure S1.** InSAR baseline plot for Sentinel-1A of 2015, multi-year stacking showing the ascending scenes (dots) and the interferograms (lines) generated using 24 days of maximum temporal baseline. The reference (master) image used at the co-registration step is 2015-08-02. The scenes and interferograms selected for multi-year stacking are indicated in black. Discarded interferograms are indicated in red. Details about processing parameters are described in Section 2 and Table S1.

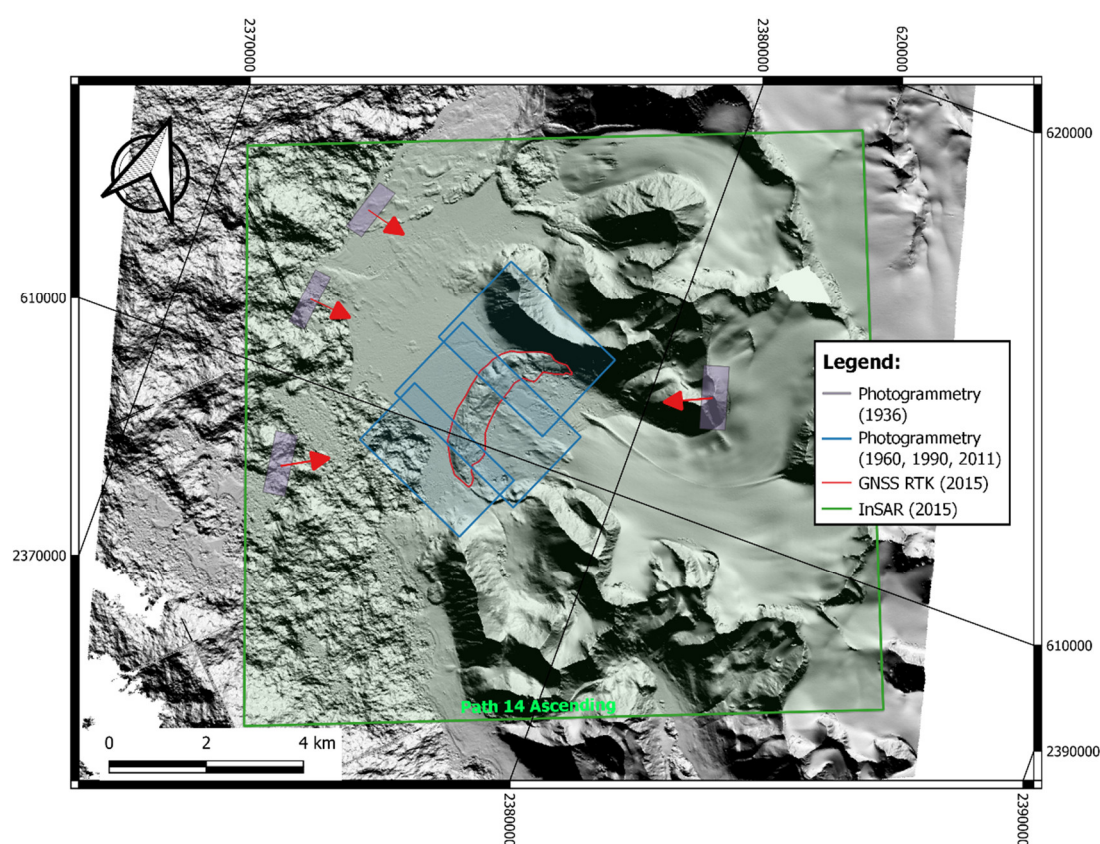

**Figure S2.** Location of the processed area of Sentinel 1A Tracks 14 in green color box, indicative location of photogrammetry picture in violet color box with red arrow for axis direction, and blue color box. GNSS RTK measurements in red polygon. In background, Digital Elevation Model (DEM) from ArcticDEM <https://www.pgc.umn.edu/data/arcticdem/>. Reference system WGS 84/ UPS North (EPSG:32661).

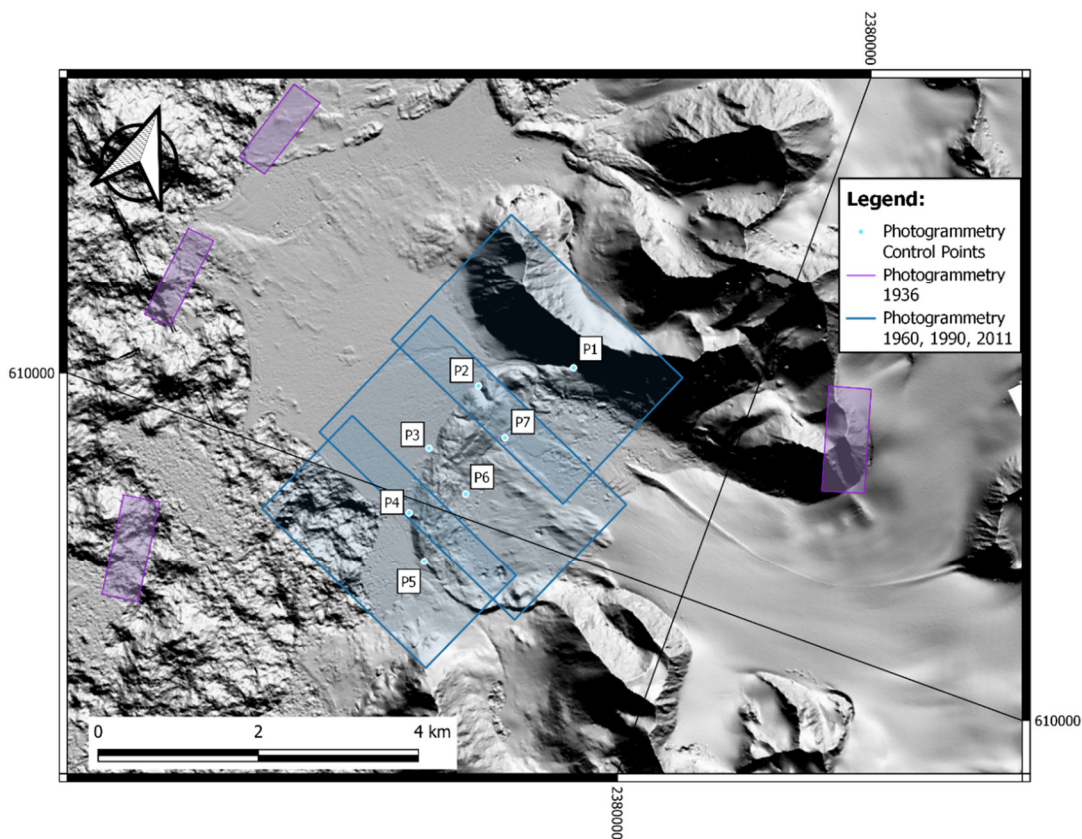

**Figure S3.** Location of photogrammetry control points (blue dots). Indicative location of photogrammetry picture (violet and blue). In background, Digital Elevation Model (DEM) from ArcticDEM <https://www.pgc.umn.edu/data/arcticdem/>. Reference system WGS 84/ UPS North (EPSG:32661).
